# Supplementary material for: Correlation between Dietary Intake of Vitamins and Oral Health Behaviors: A Cross-Sectional Study
Source: MDPI journal article supplement (doi:10.3390/ijerph20075243), 2023-03-23
Supplement: s1 [file s1]

# Supplementary Materials

**Table S1.** Correlation among the vitamins intakes.

|   | Vitamins               | 1        | 2        | 3        | 4        | 5        | 6        | 7     |
|---|------------------------|----------|----------|----------|----------|----------|----------|-------|
| 1 | Vitamin A              | 1.000    |          |          |          |          |          |       |
| 2 | Vitamin B <sub>2</sub> | 0.466 ** | 1.000    |          |          |          |          |       |
| 3 | Vitamin B <sub>6</sub> | 0.520 ** | 0.546 ** | 1.000    |          |          |          |       |
| 4 | Niacin                 | 0.337 ** | 0.417 ** | 0.730 ** | 1.000    |          |          |       |
| 5 | Folic acid             | 0.615 ** | 0.594 ** | 0.793 ** | 0.557 ** | 1.000    |          |       |
| 6 | Vitamin E              | 0.522 ** | 0.509 ** | 0.553 ** | 0.564 ** | 0.548 ** | 1.000    |       |
| 7 | Vitamin K              | 0.482 ** | 0.431 ** | 0.590 ** | 0.426 ** | 0.675 ** | 0.505 ** | 1.000 |

\*\*:  $p < 0.01$ .

**Table S2.** Correlation between %BOP and intake of vitamins.

| Vitamins                | Whole<br>(n = 218) | Nonsmoking<br>(n = 174) | Smoking<br>(n = 44) |
|-------------------------|--------------------|-------------------------|---------------------|
| Vitamin A               | 0.00               | 0.02                    | -0.02               |
| Vitamin B <sub>1</sub>  | -0.09              | -0.12                   | 0.04                |
| Vitamin B <sub>2</sub>  | -0.07              | -0.10                   | 0.07                |
| Vitamin B <sub>6</sub>  | -0.02              | -0.01                   | -0.01               |
| Vitamin B <sub>12</sub> | -0.09              | -0.09                   | -0.09               |
| Folic Acid              | 0.06               | 0.09                    | 0.00                |
| Niacin                  | -0.08              | -0.07                   | -0.11               |
| Vitamin C               | -0.01              | 0.00                    | 0.05                |
| Vitamin D               | 0.05               | 0.07                    | 0.01                |
| Vitamin E               | -0.06              | -0.04                   | -0.14               |
| Vitamin K               | 0.07               | 0.06                    | 0.13                |

**Table S3.** Differences of food intakes between two groups divided based on oral health behavior with interdental cleaning or tongue brushing.

| Food (m, g/day)                | Oral Health Behavior with                                |                  | p-Value |
|--------------------------------|----------------------------------------------------------|------------------|---------|
|                                | Interdental Cleaning or Tongue Brushing<br>Yes (n = 133) | No (n = 85)      |         |
| Beans including processed food | 31.7 (0–370)                                             | 32.1 (0–375)     | 0.388   |
| Green and yellow vegetable     | 86.8 (0–496)                                             | 65.6 (0–422)     | 0.009   |
| Milk, dairy products           | 140.0 (0–626)                                            | 60.0 (0–628)     | 0.069   |
| Grains                         | 375.0 (39–857)                                           | 400.0 (155–1180) | 0.136   |
